# Supplementary material for: Esophageal Stent in Acute Refractory Variceal Bleeding: A Systematic Review and a Meta-Analysis
Source: MDPI journal article supplement (doi:10.3390/jcm13020357), 2024-01-09
Supplement: s1 [file s1]

**Supplementary Materials:**  
**Supplementary Figures**

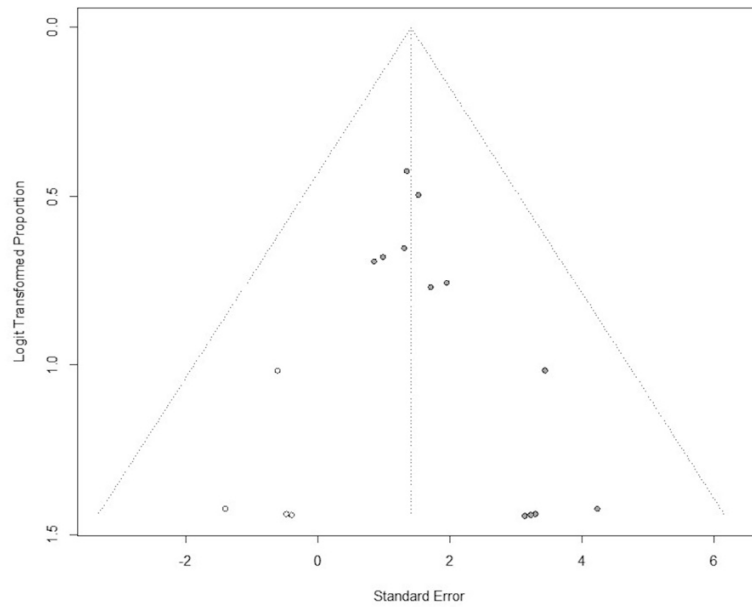

**Supplementary Figure S1:** Funnel plot of SEMS in immediate bleeding control.

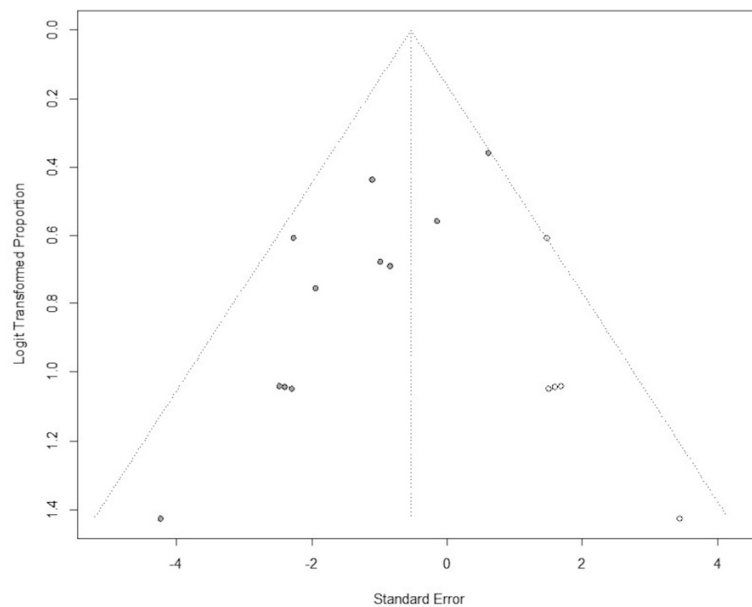

**Supplementary Figure S2:** Funnel plot of SEMS and rate of rebleeding.

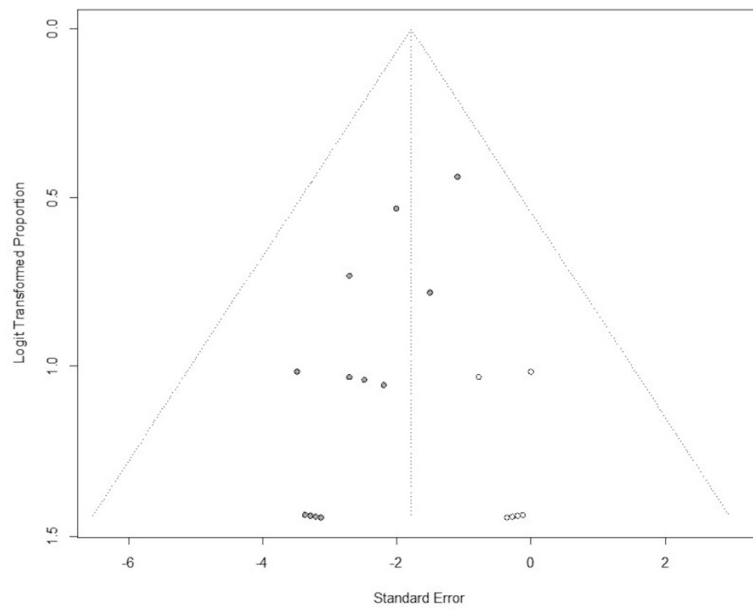

**Supplementary Figure S3:** Funnel plot of SEMS and rate of stent ulceration.

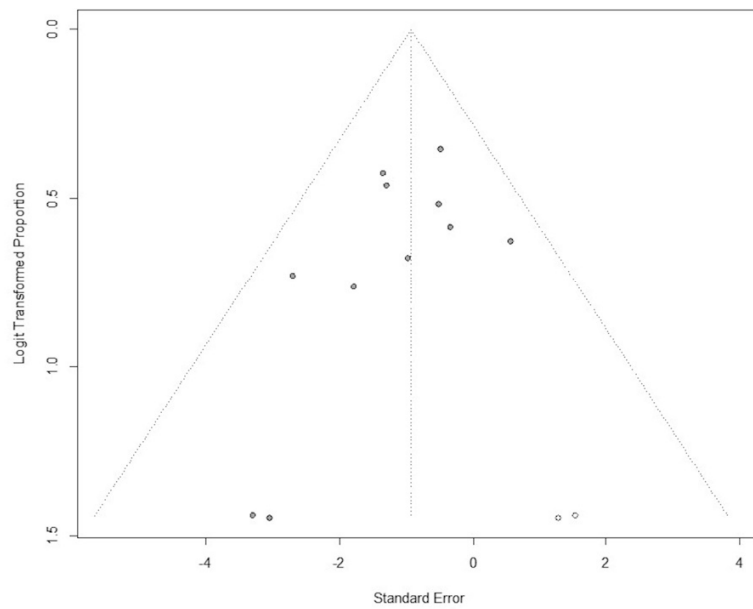

**Supplementary Figure S4:** Funnel plot of SEMS and rates of stent migration.

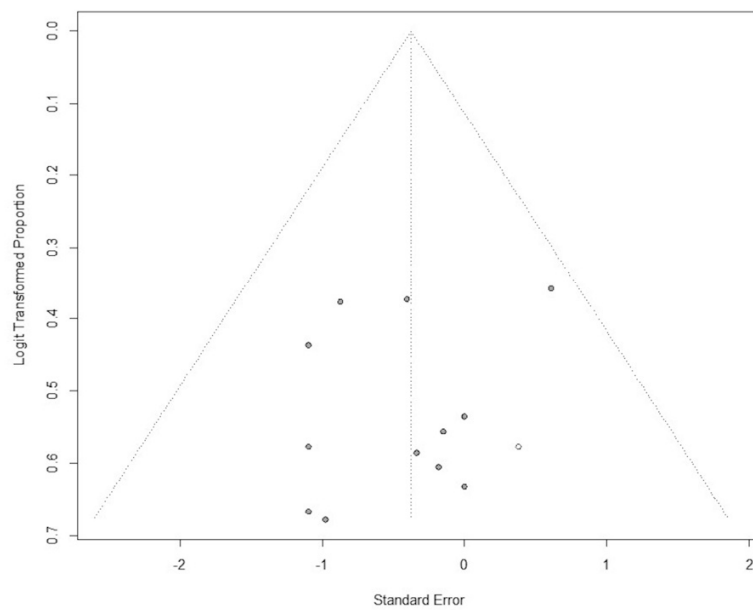

**Supplementary Figure S5:** Funnel plot of SEMS and overall mortality rate.

## Supplementary Table

**Supplementary Table S1:** Table demonstrates a meta-regression.

| Dependent Variable | Model | Independent Variable                                      | $\beta$  | SE       | z-statistic | p-value |
|--------------------|-------|-----------------------------------------------------------|----------|----------|-------------|---------|
| Rebleeding         | 1     | Intercept                                                 | -244.829 | 184.9891 | -1.3235     | 0.1857  |
|                    |       | Year                                                      | 0.1206   | 0.0917   | 1.315       | 0.1885  |
|                    |       | k = 11, $\tau^2$ = 1.178, I <sup>2</sup> = 74%, p < 0.001 |          |          |             |         |
|                    | 2     | Intercept                                                 | -5.2042  | 3.904    | -1.3331     | 0.1825  |
|                    |       | Age                                                       | 0.0638   | 0.0685   | 0.9306      | 0.3521  |
|                    |       | k = 11, $\tau^2$ = 1.124, I <sup>2</sup> = 75%, p < 0.001 |          |          |             |         |
|                    | 3     | Intercept                                                 | -1.5207  | 0.9272   | -1.64       | 0.101   |
|                    |       | Male                                                      | -0.0057  | 0.0506   | -0.1118     | 0.911   |
|                    |       | k = 11, $\tau^2$ = 1.394, I <sup>2</sup> = 76%, p < 0.001 |          |          |             |         |
|                    | 4     | Intercept                                                 | 0.5052   | 2.6981   | 0.1873      | 0.8515  |
|                    |       | Follow-up                                                 | -0.0504  | 0.0649   | -0.7763     | 0.4376  |
|                    |       | k = 10, $\tau^2$ = 1.477, I <sup>2</sup> = 80%, p < 0.001 |          |          |             |         |
| Stent migration    | 5     | Intercept                                                 | -42.0163 | 169.5924 | -0.2477     | 0.8043  |
|                    |       | Year                                                      | 0.0201   | 0.0841   | 0.2389      | 0.8112  |
|                    |       | k = 12, $\tau^2$ = 1.136, I <sup>2</sup> = 74%, p < 0.001 |          |          |             |         |
|                    | 6     | Intercept                                                 | -2.3817  | 3.8294   | -0.622      | 0.534   |
|                    |       | Age                                                       | 0.0158   | 0.0681   | 0.2319      | 0.8166  |
|                    |       | k = 12, $\tau^2$ = 1.109, I <sup>2</sup> = 76%, p < 0.001 |          |          |             |         |
|                    | 7     | Intercept                                                 | -1.6344  | 0.7934   | -2.0599     | 0.0394  |
|                    |       | Male                                                      | 0.0081   | 0.0414   | 0.1954      | 0.845   |
|                    |       | k = 12, $\tau^2$ = 1.138, I <sup>2</sup> = 75%, p < 0.001 |          |          |             |         |
|                    | 8     | Intercept                                                 | -1.522   | 0.7158   | -2.1263     | 0.0335  |
|                    |       | Follow-up                                                 | -0.0019  | 0.0103   | -0.1815     | 0.856   |
|                    |       | k = 11, $\tau^2$ = 1.266, I <sup>2</sup> = 77%, p < 0.001 |          |          |             |         |

**Supplementary Table S2:** The Newcastle-Ottawa quality assessment scale of the included cohort studies.

|           | <b>Selection</b>   |                                     |               |                                 | <b>Comparability</b>        | <b>Outcome</b>        |                    |                       | <b>Total score</b> |
|-----------|--------------------|-------------------------------------|---------------|---------------------------------|-----------------------------|-----------------------|--------------------|-----------------------|--------------------|
|           | Representativeness | Selection of the non-exposed cohort | Ascertainment | Endpoint not presented at start | Comparability (confounding) | Assessment of outcome | Follow-up duration | Adequacy of follow-up |                    |
| Drastich  | ★                  | ★                                   | ★             | ★                               | ★                           | ★                     | ★                  | 0                     | 7                  |
| Elbahr    | ★                  | ★                                   | ★             | ★                               | ★                           | ★                     | ★                  | ★                     | 8                  |
| Escorsell | ★                  | ★                                   | ★             | ★                               | ★                           | ★                     | ★                  | ★                     | 8                  |
| Goenka    | ★                  | ★                                   | ★             | ★                               | ★                           | ★                     | ★                  | ★                     | 8                  |
| Khan      | ★                  | ★                                   | ★             | ★                               | ★                           | ★                     | ★                  | ★                     | 8                  |
| Mishin    | ★                  | ★                                   | ★             | ★                               | ★                           | 0                     | ★                  | ★                     | 7                  |
| Muller    | ★                  | ★                                   | ★             | ★                               | ★                           | ★                     | ★                  | ★                     | 8                  |
| Pfisterer | ★                  | ★                                   | ★             | ★                               | ★                           | ★                     | ★                  | ★                     | 8                  |
| Shah      | ★                  | ★                                   | ★             | ★                               | ★                           | ★                     | ★                  | ★                     | 8                  |
| Wright    | ★                  | ★                                   | ★             | ★                               | ★                           | ★                     | ★                  | ★                     | 8                  |
| Zakaria   | ★                  | ★                                   | ★             | ★                               | ★                           | ★                     | 0                  | ★                     | 7                  |
| Zehetner  | ★                  | ★                                   | ★             | ★                               | ★                           | ★                     | ★                  | ★                     | 8                  |
